# Supplementary material for: Modification of the supramolecular structure of [(thione)IY] (Y = Cl, Br) systems by cooperation of strong halogen bonds and hydrogen bonds
Source: Royal Society of Chemistry journal article supplement (doi:10.1039/c4ce02449d), 2015-01-01
Supplement: c4ce02449d1.pdf [file c4ce02449d1.pdf]

## Supporting Information

### Modification of the Supramolecular Structure of [(thione)IY] (Y= Cl, Br) Systems by Cooperation of Strong Halogen Bonds and Hydrogen Bonds

Laura Koskinen,<sup>a</sup> Pipsa Hirva,<sup>a\*</sup> Assi Hasu,<sup>a</sup> Sirpa Jääskeläinen,<sup>a</sup> Juha Koivistoinen,<sup>b</sup> Mika Pettersson,<sup>b</sup> and Matti Haukka<sup>c\*</sup>

<sup>a</sup>Department of Chemistry, University of Eastern Finland, Joensuu Campus, P.O. Box 111, FI-80101 Joensuu, Finland

<sup>b</sup> Department of Chemistry, Nanoscience Center, University of Jyväskylä, P.O. Box 35, FI-40014 Jyväskylä, Finland

<sup>c</sup>Department of Chemistry, University of Jyväskylä, P.O. Box 35, FI-40014 Jyväskylä, Finland

\*Corresponding Author.

Pipsa Hirva: E-mail: pipsa.hirva@uef.fi. Tel.: +358-503310829.

Matti Haukka: E-mail: matti.o.haukka@jyu.fi. Tel.: +358-408054666.

#### TABLE OF CONTENT

|                                                                                                                     |    |
|---------------------------------------------------------------------------------------------------------------------|----|
| <b>Figure S1.</b> UV-Vis spectra of <b>1-4</b> .                                                                    | S2 |
| <b>Table S1.</b> Properties of the electron density at the bond critical points of the free thiones and dihalogens. | S2 |

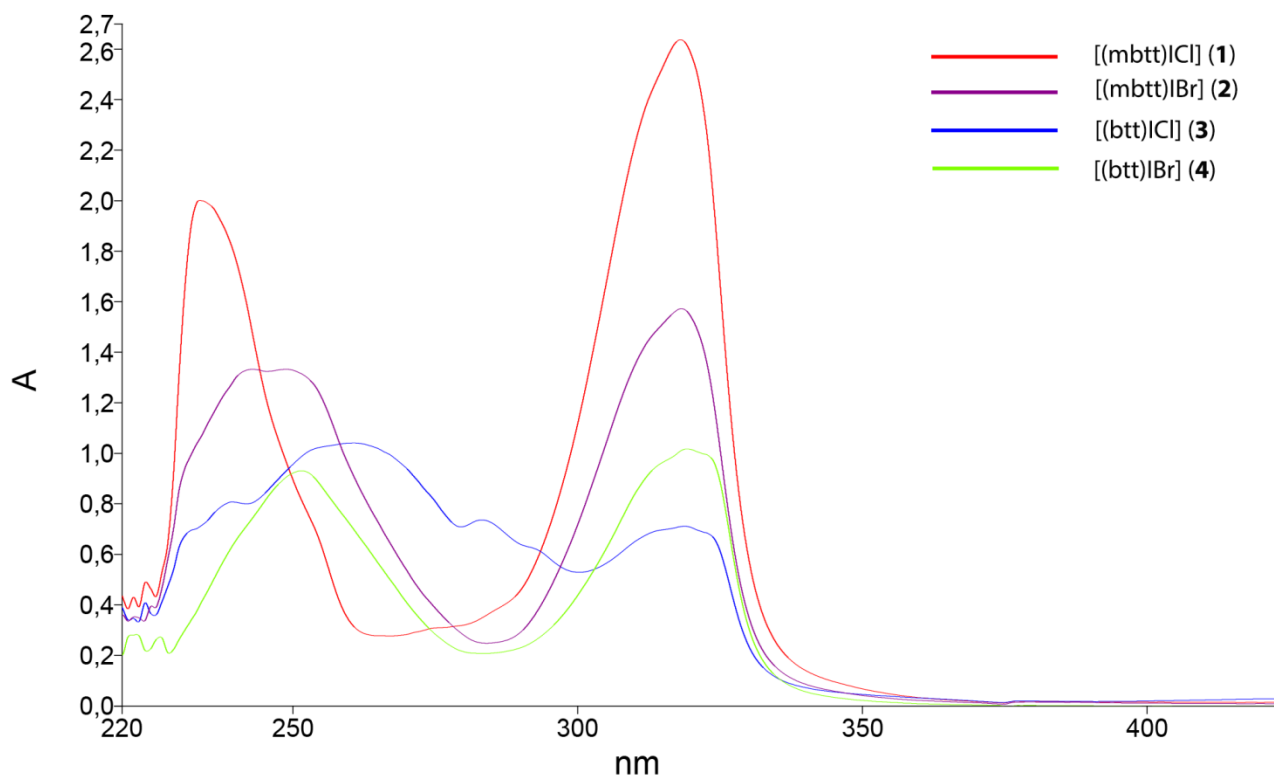

**Figure S1.** UV-Vis spectra of **1-4** in THF.

**Table S1.** Properties of the electron density at the C=S or I $\cdots$ Y bond critical points of the free mbtt and btt molecules and the dihalogens ICl, IBr, and I<sub>2</sub>.

| Compound                    | d<br>(Å) | $\rho$<br>(eÅ <sup>-3</sup> ) | V /G | E <sub>int</sub><br>(kJmol <sup>-1</sup> ) | $\Omega$ (A, B) | q(S)   | q(I) <sup>b</sup> | q(Y) <sup>c</sup> |
|-----------------------------|----------|-------------------------------|------|--------------------------------------------|-----------------|--------|-------------------|-------------------|
| mbtt                        | 1.712    | 1.3487                        | 2.28 | -536                                       | 1.53            | -0.061 |                   |                   |
| btt                         | 1.709    | 1.3510                        | 2.25 | -544                                       | 1.56            | -0.037 |                   |                   |
| ICl <sup>a</sup>            | 2.313    | 0.7209                        | 1.83 | -140                                       | 1.35            |        | 0.323             | -0.323            |
| IBr <sup>a</sup>            | 2.462    | 0.6316                        | 1.93 | -101                                       | 1.38            |        | 0.187             | -0.187            |
| I <sub>2</sub> <sup>a</sup> | 2.654    | 0.5323                        | 1.98 | -73                                        | 1.41            |        | 0.000             | 0.000             |

<sup>a</sup> computationally optimized structures; <sup>b</sup> the interacting iodine I(1) in the thione $\cdots$ I-Y adduct; <sup>c</sup> the non-interacting halogen Y.
